# Supplementary material for: Advances in tuning the “d33 ∝ 1/Td” bottleneck: simultaneously realizing large d33 and high Td in Bi0.5Na0.5TiO3-based relaxor ferroelectrics
Source: Royal Society of Chemistry journal article supplement (doi:10.1039/d0ta01559h), 2020-01-01
Supplement: d0ta01559h1.pdf [file d0ta01559h1.pdf]

**Figure S0.** The free-energy state is tightly correlated with the temperature. (a) The detailed free-energy states reflected by polarization distributions against decreasing temperature and (b) the corresponding evolution of free-energy against decreasing temperature. Rapid quenching from extraordinarily high temperatures freezes the high-energy states, leading to the longer coherence length and the enhanced polarization summation.
